# Supplementary material for: A new mononuclear Fe(iii) Mannich-base complex with selective histidine binding and catechol oxidase activity
Source: Royal Society of Chemistry journal article supplement (doi:10.1039/d2nj03501d), 2023-01-01

**Fig . S1** Time dependent mass spectra of mixture of complex **(1)** and 3,5 DTBC in methanol.

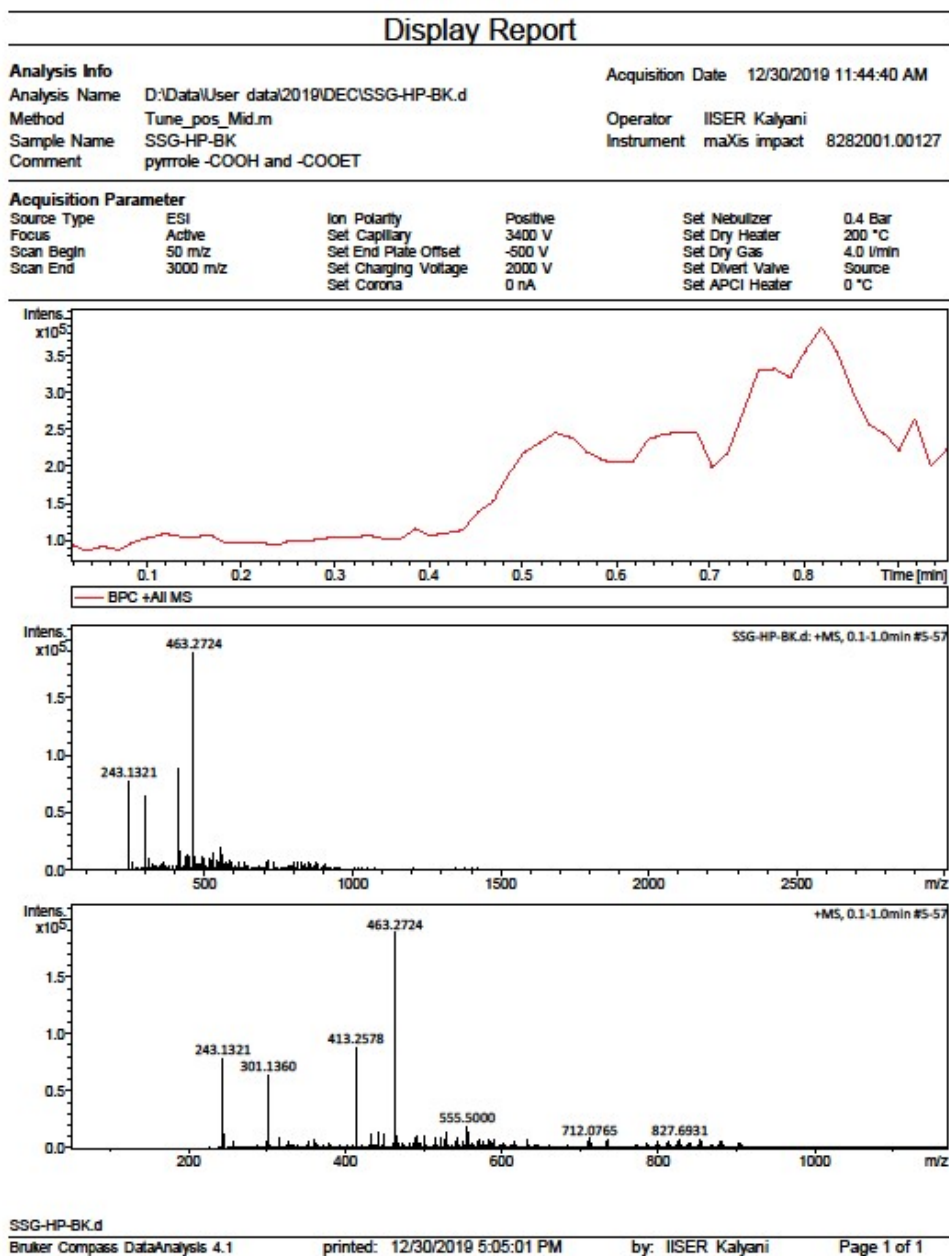

Fig . S2 IR Spectra of complex (1).

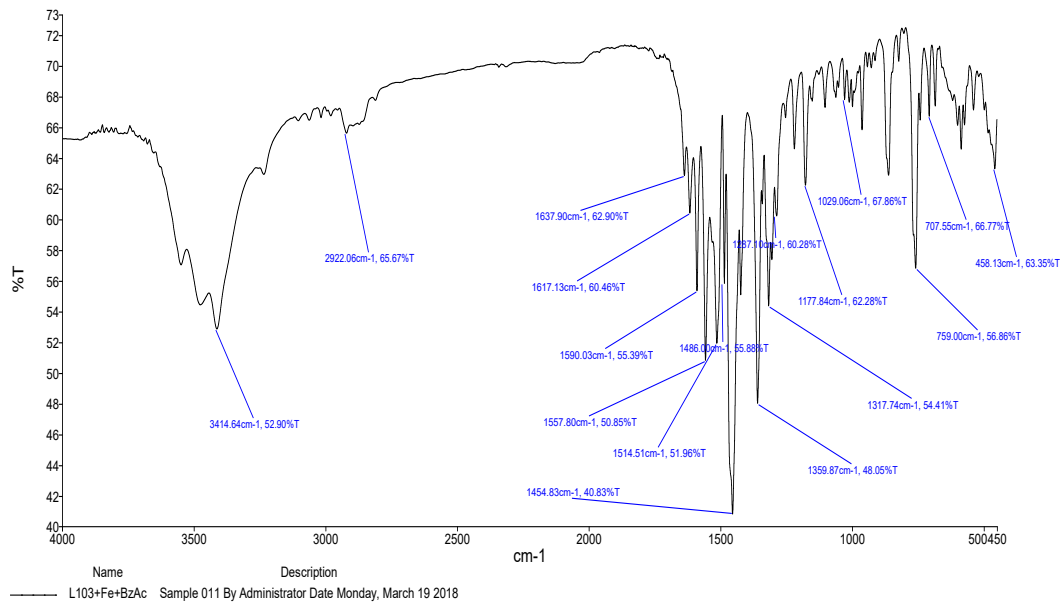

Supplement: d2nj03501d1.pdf [file d2nj03501d1.pdf]
